# Supplementary material
Source: Springer Nature journal article supplement (https://www.springermedizin.de/resource/supplementary/12913_2012_2602_MOESM1_ESM.pdf/9530942)
Supplement: MOESM1 [file 9530942]

### **Stage 1: Initial search**

Electronic Search: Pubmed, Science Direct and Web of Knowledge  
Keywords: Title and abstract contain *patient* OR *hospital* OR *healthcare* OR *care* OR *medical* AND *neglect* OR *inadequate care* OR *substandard care* NOT *visual* OR *hemispatial* OR *stroke*  
Limitations: Articles in English and published after 1990.  
Results: 2815 articles

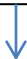

### **Stage 2: Screening of results**

Filter: Titles examined for relevance  
Filter: Relevance of abstract examined in order to assess information presented in the study  
Results: 42 articles

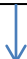

### **Stage 3: Article selection**

Inclusion criteria 1: Collects primary data on the occurrence of patient neglect in healthcare institutions OR  
Inclusion criteria 2: Collects primary data on the factors explaining why patient neglect occurs, AND  
Hand search: Search of i) reference lists from included studies, and ii) articles citing identified articles in order to identify further items of interest  
Results: 10 research articles and 4 reports were identified.
